# Supplementary material for: Mining TCGA Database for Tumor Microenvironment-Related Genes of Prognostic Value in Hepatocellular Carcinoma
Source: Biomed Res Int. 2019 Nov 19;2019:2408348. doi: 10.1155/2019/2408348 (PMC6885833; doi:10.1155/2019/2408348)
Supplement: Supplementary Materials — Table S1: the survival analysis results of the 289 DEGs. [file 2408348.f1.xlsx]

## Sheet: survival
Table S1: the survival analysis results of the 289 DEGs.
DEGs	Hazard ratio	P value
XCR1	1.91266	0.000310239
ACKR1	1.88399	0.000402565
UBASH3A	1.78537	0.00125298
PRKCQ	1.77541	0.00129347
C16orf54	1.76275	0.00150224
ITGB6	0.581526	0.00208384
CD5	1.69837	0.00316945
IL7R	1.62812	0.00656559
TESPA1	1.59566	0.0086664
ICAM3	1.59644	0.00893125
SLAMF6	1.59085	0.00900735
STRA6	0.631495	0.00982922
CLEC1B	1.56503	0.0118621
CD69	1.56127	0.0120975
THEMIS	1.56208	0.0122727
LCK	1.55356	0.0130402
SH2D1A	1.55399	0.013369
MS4A1	1.55667	0.0136934
CD5L	1.54084	0.0141022
CD226	1.54596	0.0144657
CRHBP	1.54278	0.0144721
PTGIS	0.64922	0.0147774
PLN	1.53149	0.016226
CCR7	1.53085	0.0169753
GPM6A	1.52263	0.0172847
CAMK4	1.52511	0.0173966
ITK	1.51538	0.0197861
PLEKHS1	0.667417	0.0208794
MMP7	0.665282	0.0216793
LY9	1.50326	0.0218701
C7	1.50089	0.0219972
GALNT5	0.669192	0.0245673
CD3G	1.48981	0.0248281
CD6	1.48446	0.0262114
CD80	0.673455	0.0279003
MYEOV	0.680393	0.0285872
BTLA	1.4737	0.0292526
CD2	1.47226	0.0297374
CD96	1.46368	0.0309799
GPR84	0.68094	0.0318335
GZMK	1.45392	0.0353832
FABP3	0.697145	0.0441331
IL11	0.700018	0.0448185
CLEC9A	1.42717	0.0459981
MMP12	0.704245	0.0480991
TNFRSF13C	1.41493	0.0520468
PODNL1	0.70799	0.0522396
STAP1	1.40983	0.0548923
CD3E	1.39966	0.0583063
ADAM28	0.719404	0.0603968
ADGRB2	0.720871	0.0663615
MAMDC2	1.38593	0.0673226
MNDA	0.726797	0.0698375
CLEC7A	0.725324	0.0740463
CDH17	0.729383	0.074369
LRRC15	0.72798	0.0759306
CD40LG	1.36109	0.0813682
CYBB	0.730414	0.0816468
CD79A	1.36309	0.0829796
ADGRE2	0.732945	0.083196
SPN	1.35945	0.0834866
WNT2	0.737737	0.0835926
MAL	1.35887	0.0842494
CCR5	1.35761	0.0852185
IKZF1	1.34686	0.0943368
CXCR1	1.3385	0.0970452
HSPB2	0.749149	0.107288
IL2RA	0.751898	0.109876
TCL1A	1.32529	0.113096
PI16	1.32455	0.11388
RASL10B	0.754579	0.113894
CD48	1.32015	0.117405
KLK10	0.7592	0.118168
CDH11	0.757424	0.118966
KCNA3	1.31833	0.120617
PTN	1.31448	0.122792
FCRL3	1.3089	0.131405
CXCR6	1.30492	0.134639
MAP1A	0.764726	0.134833
TNNT3	1.29631	0.145302
CCL11	1.29196	0.149384
TAGAP	1.2805	0.163813
FBLN2	1.28007	0.164441
DNAJC5B	0.781179	0.165789
WNT10A	1.28013	0.166049
TLR7	0.781741	0.169952
PLAU	0.782518	0.17073
TMPRSS4	0.785372	0.173043
SHISA3	1.26953	0.177021
PLAC8	1.27018	0.179197
FAM163B	1.26707	0.17992
RASGRP1	1.268	0.179987
FCRLA	1.2665	0.185678
TMEM158	0.792917	0.190981
CTSK	0.795959	0.1982
GPNMB	0.796992	0.204147
OMD	1.25123	0.205784
KLHL6	1.25106	0.206634
GBP5	1.25088	0.208561
CLEC4E	1.24622	0.216411
INMT	1.24583	0.216689
NLRP3	0.802306	0.217411
CRTAM	1.24451	0.218116
DCLK1	0.803247	0.221084
CLEC12A	1.24225	0.222163
PLAC9	1.23858	0.226933
CRYBB1	0.80742	0.22711
CFP	1.23927	0.228124
ADGRE1	1.23453	0.233103
CEACAM6	0.810395	0.235961
ADAM33	1.23116	0.242425
LILRA4	1.22887	0.246335
KLK4	0.817717	0.255948
JCHAIN	1.22378	0.256725
TNFSF8	1.22335	0.257109
VSIG4	0.818948	0.261748
PDCD1LG2	1.21995	0.26312
DPT	1.21746	0.268427
CXCL9	1.21353	0.27548
GLIPR2	0.824134	0.278687
TFEC	0.828326	0.288488
MAP1LC3C	1.20758	0.289361
TPSAB1	1.20107	0.289982
P2RX1	1.20169	0.2936
OSM	0.830679	0.297393
CCBE1	1.20384	0.297558
SFTA2	1.20266	0.300643
CR1	0.832468	0.302993
PDPN	0.838145	0.320176
GPRC5A	0.841995	0.328743
CELF2	1.18849	0.329757
CXCR2	1.18786	0.331134
GPR65	1.18467	0.3386
CDH3	0.844372	0.338911
DCN	1.18299	0.344221
TMEM119	0.846325	0.349448
GAL3ST4	0.846744	0.350936
FPR3	0.846594	0.351008
TIMD4	1.17809	0.355633
ARHGAP15	1.1775	0.358288
MMP2	0.850416	0.363526
CILP	0.852433	0.368491
SLAMF8	0.851803	0.370479
CALB2	0.855302	0.377165
OMG	1.16808	0.381811
ISLR	0.857019	0.387282
HBD	1.16152	0.399235
CHRNA1	0.861049	0.39977
PI3	0.860348	0.400022
FYB1	1.16078	0.400866
SIGLEC7	0.861869	0.404332
CHIT1	0.863104	0.408493
SELPLG	1.15429	0.418524
IGFN1	0.866574	0.419641
WDFY4	1.15348	0.422614
SCARA5	1.15193	0.426228
SLAMF7	1.14934	0.432748
MFAP4	1.14876	0.436077
BANK1	1.14769	0.440679
CCL19	1.14653	0.441536
TWIST1	0.872276	0.441984
HTRA4	1.14489	0.446003
MXRA5	1.14111	0.457259
FCMR	1.14126	0.458045
RASSF2	0.876144	0.458494
HAVCR2	0.877087	0.46111
CHI3L2	0.879169	0.469788
CHRDL1	0.880041	0.471637
SELL	1.1355	0.47537
MS4A7	1.13238	0.483931
DUOXA2	0.884626	0.491801
ALOX5AP	0.885256	0.49215
FAP	0.88518	0.49327
FAM83E	1.13003	0.493334
DAPP1	1.12878	0.494376
MOXD1	0.887984	0.504197
PAGE4	1.1248	0.506326
DES	0.889343	0.50886
ADRA2A	1.12444	0.50913
RUNX2	1.12295	0.512137
CADM3	1.12358	0.512635
SIGLEC10	0.89176	0.518018
EMB	1.12093	0.519882
LILRB4	0.893022	0.525349
IL10	0.893226	0.526184
C16orf89	0.894973	0.526648
PTGS2	0.89496	0.52775
FCGR1A	0.894238	0.529074
TNFRSF8	1.11805	0.531152
BMP5	1.11759	0.531979
GAS1	1.11717	0.532004
SIGLEC14	1.11597	0.534018
BHLHE22	1.11684	0.534538
SLA	1.11592	0.53704
TRARG1	1.11444	0.541276
TPSB2	1.11089	0.546159
SVEP1	1.11277	0.547521
STMN2	0.89979	0.553252
SIRPB1	0.904178	0.570468
CD70	1.10587	0.571375
EPB41L3	0.90431	0.571989
SAMSN1	0.906131	0.578636
CD163	0.907715	0.584829
CCL21	1.10085	0.589126
HLA-DOA	1.0996	0.592961
CALHM6	1.09834	0.595328
HAS1	1.09664	0.602604
CTNNA2	1.09146	0.622045
ITGA4	0.916303	0.623796
TNC	0.917093	0.625399
PODN	1.09035	0.626852
RHBG	0.917541	0.627835
STAB2	1.08959	0.629002
SFRP1	1.0846	0.648251
AOAH	1.07871	0.669796
HLA-DQA2	0.92717	0.670252
NFAM1	1.07755	0.672846
CD37	1.07708	0.676256
FPR1	1.07643	0.678938
CSF2RB	0.929491	0.680489
IL13RA2	1.07546	0.682764
PLA2G2D	1.07501	0.683616
GPR174	1.07444	0.68622
CRTAC1	1.07429	0.686708
GAPT	0.931846	0.687082
GABRP	0.931511	0.689273
IL21R	0.932978	0.695588
CCDC80	0.935198	0.706491
HCLS1	1.06691	0.714558
PTPRC	1.0666	0.715918
DOCK2	1.06633	0.717737
LOXL1	1.06622	0.718516
RAB33A	0.93838	0.71944
GPBAR1	0.939702	0.726169
CD53	1.06391	0.726263
GPR132	1.06287	0.73065
MS4A6A	1.06209	0.734785
CCR4	1.06039	0.739048
VSIG1	0.9425	0.73914
TLR8	1.06007	0.742865
WDR86	1.05941	0.744977
AIM2	1.05859	0.74913
APOBEC3C	1.05801	0.751066
SIRPB2	0.945414	0.752394
ADAMDEC1	0.946432	0.754489
CD52	1.05386	0.767618
NDNF	0.948892	0.768033
MYL9	0.954404	0.79297
FGF7	0.954679	0.794033
HLA-DQA1	1.04635	0.798766
EVI2B	0.955931	0.800096
PRELP	1.04307	0.812564
HAPLN3	0.95892	0.813392
MARCO	0.958977	0.813833
CCL22	1.04188	0.817098
RGSL1	1.03981	0.825578
WISP2	1.03994	0.825612
CLEC4G	1.03772	0.835198
GPR68	1.03497	0.846811
NMNAT2	0.966851	0.850046
SUSD5	0.967517	0.852791
P2RY12	1.03145	0.861196
AEBP1	0.970227	0.865216
P2RY13	1.02983	0.868527
SRPX	1.02785	0.877204
CR2	1.02725	0.880275
KCNN4	1.02527	0.8882
ANK2	0.975375	0.88853
HAND2	1.02418	0.89323
RHBDL3	0.979067	0.9051
DUOX2	0.980863	0.91348
CD1B	1.0184	0.917193
CD177	1.01743	0.92285
FGL2	1.01584	0.929592
ZNF683	1.01397	0.937874
CD22	0.987962	0.945574
GFPT2	1.01168	0.947919
FCER2	0.989504	0.95273
GPR183	1.00939	0.958076
SIGLEC8	0.990783	0.958475
EMILIN1	0.992251	0.965067
CXCL14	0.993208	0.969385
CLMP	0.993708	0.971697
LUM	0.994509	0.975293
CD84	1.0037	0.983459
COX7A1	0.996489	0.984185
ACTN2	0.997031	0.986674
TNFSF13B	1.00168	0.992426
PRUNE2	1.00024	0.998943
